# Supplementary material
Source: Hindawi journal article supplement (doi:10.1155/2011/495074)
Supplement: f1 [file 495074.f1.pdf]

**Supplementary Table S1:** Mycobacteria detected in rodents and insectivores in and around Morogoro, Tanzania

| Mycobacteria <sup>a</sup>                 | Small mammal species  | Trapping site  | Reactor status <sup>b</sup><br>(Present/Past/Future) | Organ <sup>c</sup> | Detected by<br>PCR or Culture | Number of colonies<br>detected by culture |
|-------------------------------------------|-----------------------|----------------|------------------------------------------------------|--------------------|-------------------------------|-------------------------------------------|
| Human risk group 1 <sup>e</sup>           |                       |                |                                                      |                    |                               |                                           |
| <i>M. duvalii</i> ***                     | <i>C. gambianus</i>   | Mwembesongo    | na                                                   | Spleen             | Culture                       | 1                                         |
| <i>M. gordonae</i>                        | <i>A. albiventris</i> | Slaughterhouse | na                                                   | Liver/Spleen       | PCR                           |                                           |
| <i>M. gordonae</i> -like                  | <i>C. gambianus</i>   | Mwembesongo    | na                                                   | Liver              | PCR                           |                                           |
| <i>M. gordonae</i> -like**                | <i>C. hirta</i>       | Cattle farm    | RR/nt/NR                                             | ML                 | Culture                       | 1                                         |
| <i>M. gordonae</i> -like                  | <i>C. hirta</i>       | Cattle farm    | RR/NR/nt                                             | Liver              | PCR                           |                                           |
| <i>M. gordonae</i> -like                  | <i>M. natalensis</i>  | Cattle farm    | RR/nt/RR                                             | Liver              | PCR                           |                                           |
| <i>M. moriokaense</i> *                   | <i>R. rattus</i>      | Cattle farm    | RR/nt/RR                                             | ML                 | Culture                       | 1                                         |
| <i>M. mucogenicum</i>                     | <i>M. natalensis</i>  | Cattle farm    | RR/nt/RR                                             | ML                 | PCR                           |                                           |
| <i>M. nonchromogenicum</i>                | <i>C. hirta</i>       | Cattle farm    | RR/RR/nt                                             | Lung               | Culture                       | 1                                         |
| <i>M. nonchromogenicum</i> * <sup>d</sup> | <i>R. rattus</i>      | Cattle farm    | RR/nt/RR                                             | Liver              | Culture                       | 1                                         |
| <i>M. nonchromogenicum</i> -like          | <i>M. natalensis</i>  | Cattle farm    | RR/nt/RR                                             | Lung               | Culture                       | 1                                         |
| <i>M. nonchromogenicum</i> -like          | <i>R. rattus</i>      | Cattle farm    | NR/nt/NR                                             | ML                 | PCR                           |                                           |
| <i>M. sphagni</i> -like                   | <i>R. rattus</i>      | Cattle farm    | NR/nt/NR                                             | Lung               | PCR                           |                                           |
| <i>M. terrae</i>                          | <i>C. hirta</i>       | Cattle farm    | RR/nt/RR                                             | Liver/Spleen/Lung  | Culture                       | 1                                         |
| <i>M. terrae</i> ***                      | <i>C. gambianus</i>   | Mwembesongo    | na                                                   | Liver              | Culture                       | 1                                         |
| <i>M. terrae</i>                          | <i>R. rattus</i>      | Cattle farm    | RR/RR/nt                                             | Swollen foot       | Culture                       | 1                                         |
| Human risk group 2 <sup>e</sup>           |                       |                |                                                      |                    |                               |                                           |

|                                                 |                      |                |          |                 |                 |    |
|-------------------------------------------------|----------------------|----------------|----------|-----------------|-----------------|----|
| <i>M. chelonae</i> var. <i>niacinogenes</i>     | <i>M. natalensis</i> | Cattle farm    | RR/nt/RR | Liver           | PCR and culture | 17 |
| <i>M. genavense</i> -like                       | <i>C. hirta</i>      | Cattle farm    | RR/nt/RR | Lung            | PCR             |    |
| <i>M. intracellulare</i> ***                    | <i>C. gambianus</i>  | Mwembesongo    | na       | Lung            | Culture         | 1  |
| <i>M. intracellulare</i>                        | <i>C. hirta</i>      | Slaughterhouse | na       | Spleen/Lung/ ML | Culture         | 1  |
| <i>M. intracellulare</i>                        | <i>C. hirta</i>      | Cattle farm    | RR/nt/NR | ML              | PCR and culture | 7  |
| <i>M. intracellulare</i>                        | <i>C. hirta</i>      | Cattle farm    | RR/RR/nt | Liver/Lung      | Culture         | 1  |
| <i>M. intracellulare</i>                        | <i>M. natalensis</i> | Slaughterhouse | na       | Lung            | PCR and culture | 1  |
| <i>M. intracellulare</i> -like                  | <i>C. gambianus</i>  | Mwembesongo    | na       | ML              | Culture         | 1  |
| <i>M. intracellulare</i> -like                  | <i>C. gambianus</i>  | Cattle farm    | RR/RR/nt | ML              | Culture         | 1  |
| <i>M. intracellulare</i> -like                  | <i>C. hirta</i>      | Cattle farm    | RR/RR/nt | Lung            | Culture         | 1  |
| <i>M. scrofulaceum</i> -like                    | <i>C. gambianus</i>  | Mwembesongo    | na       | Spleen          | Culture         | 1  |
| <i>M. szulgai</i>                               | <i>M. natalensis</i> | Cattle farm    | RR/nt/RR | Lung            | PCR             |    |
| MAIS                                            | <i>C. gambianus</i>  | Mwembesongo    | na       | Lung            | PCR and culture | 3  |
| MAIS                                            | <i>C. gambianus</i>  | Mwembesongo    | na       | ML              | Culture         | 1  |
| MAIS                                            | <i>C. hirta</i>      | Cattle farm    | RR/nt/NR | ML              | PCR and culture | 18 |
| Recently described species, not yet classified* |                      |                |          |                 |                 |    |
| <i>M. alsiensis</i>                             | <i>M. natalensis</i> | Cattle farm    | RR/RR/nt | Spleen          | PCR and culture | 1  |
| <i>M. chimaera</i>                              | <i>C. hirta</i>      | Cattle farm    | RR/nt/NR | Spleen/Lung     | Culture         | 1  |
| <i>M. chimaera</i> -like                        | <i>C. hirta</i>      | Cattle farm    | NR/NR/nt | Spleen          | Culture         | 1  |
| <i>M. colombiense</i>                           | <i>C. hirta</i>      | Cattle farm    | RR/nt/RR | ML              | PCR and culture | 20 |
| <i>M. frederiksborgense</i> -like               | <i>M. natalensis</i> | Cattle farm    | RR/RR/nt | Lung            | PCR             |    |

|                               |                       |                |          |        |         |   |
|-------------------------------|-----------------------|----------------|----------|--------|---------|---|
| <i>M. goodii</i> <sup>d</sup> | <i>R. rattus</i>      | Cattle farm    | RR/nt/RR | Lung   | Culture | 1 |
| <i>M. immunogenum</i>         | <i>R. rattus</i>      | Cattle farm    | NR/nt/NR | Spleen | PCR     |   |
| <i>M. septicum</i>            | <i>A. albiventris</i> | Slaughterhouse | na       | Liver  | PCR     |   |
| <i>M. septicum</i>            | <i>M. natalensis</i>  | Cattle farm    | RR/nt/NR | Spleen | PCR     |   |
| <i>M. septicum</i>            | <i>M. natalensis</i>  | Cattle farm    | RR/nt/RR | ML     | PCR     |   |
| Not identified species        |                       |                |          |        |         |   |
| <i>Mycobacterium</i> sp.      | <i>C. gambianus</i>   | Slaughterhouse | na       | Lung   | Culture | 1 |
| <i>Mycobacterium</i> sp.      | <i>R. rattus</i>      | Cattle farm    | RR/nt/NR | Lung   | Culture | 1 |
| <i>Mycobacterium</i> sp.      | <i>R. rattus</i>      | Cattle farm    | RR/nt/RR | Lung   | PCR     |   |
| <i>Mycobacterium</i> sp.      | <i>C. hirta</i>       | Cattle farm    | RR/nt/RR | Spleen | PCR     |   |
| <i>Mycobacterium</i> sp.      | <i>M. natalensis</i>  | Cattle farm    | RR/nt/RR | Lung   | PCR     |   |
| <i>Mycobacterium</i> sp.      | <i>M. natalensis</i>  | Cattle farm    | RR/nt/RR | Lung   | PCR     |   |
| <i>Mycobacterium</i> sp.      | <i>C. hirta</i>       | Cattle farm    | RR/RR/nt | Spleen | PCR     |   |

<sup>a</sup>\*, <sup>\*\*</sup> and <sup>\*\*\*</sup> point out mycobacteria detected in the same group of animals, but in different organs.

<sup>b</sup> RR = reacting, NR = non-reacting, na = not applicable, nt = not tested

<sup>c</sup> ML = mesenteric lymph nodes

<sup>d</sup> These mycobacteria were first detected in 2005 in *R. rattus* trapped on a farm and were later detected in 2006 in the milk of cattle residing on the same farm (see Table 6).

<sup>e</sup> The classification in Human risk groups is based on the clinical point of view in which human risk group 1 contain species that never, or with extreme rarity cause disease. Human risk group 2 are species that normally live freely in the environment but also cause opportunistic infections in humans. Human risk group 3 are the obligate pathogens (*M. tuberculosis* complex and *M. leprae*) [50].
